# Supplementary material for: Preparation and characterization of emulsion gels stabilized by adequately preprocessed insoluble soybean fiber from okara
Source: Royal Society of Chemistry journal article supplement (doi:10.1039/d3sm00189j), 2023-01-01

**Preparation and characterization of emulsion gels stabilized by  
adequately preprocessed insoluble soybean fiber from *okara***

Lihua Huang <sup>a,b</sup>, Yongjian Cai <sup>a</sup>, Jiaqi Su <sup>b</sup>, Mouming Zhao <sup>a</sup>, Qiangzhong Zhao <sup>a,\*</sup>,

Paul Van der Meeren <sup>b,\*\*</sup>

<sup>a</sup> *School of Food Science and Engineering, South China University of Technology,  
Guangzhou, 510641, China*

<sup>b</sup> *Particle & Interfacial Technology Group, Faculty of Bioscience Engineering, Ghent  
University, 9000, Ghent, Belgium*

*\* Corresponding author*

*Qiangzhong Zhao, Professor*

*Tel: +86 (0) 20 8711 2409*

*E-mail: qzzhao@scut.edu.cn*

*\*\* Corresponding author*

*Paul Van der Meeren, Professor*

*Tel: +32 (0) 9264 6003*

*E-mail: paul.vandermeeren@ugent.be*

## Electronic Supplementary Information (ESI)

**Fig. S1** Experimental setup for the measurement of contact angle.

**Fig. S2** Fourier transform infrared spectroscopy (FTIR; A) of ISF obtained before or after steam explosion (1.5 MPa for 90 s) associated with alkaline treatment or enzymatic hydrolysis by protease, and the visual appearance (B) of ISF stabilized emulsions ( $c=0.40$  wt%,  $\phi=0.1$ ) during 30 days of storage.

**Fig. S3** Visual appearance of ISF<sub>E</sub>-stabilized emulsions gels at different ISF concentrations ( $c=0.25$  to 1.50 wt%) and oil volume fractions ( $\phi=0.1$  to 0.5) during 30 days of storage. Tubes from left to right in each picture represent emulsion gels with 0.25 wt%, 0.50 wt%, 0.75 wt%, 1.00 wt% and 1.50 wt% ISF<sub>E</sub>, respectively.

**Fig. S4** Storage modulus ( $G'$ ) and loss modulus ( $G''$ ) as a function of strain from an amplitude sweep ( $\gamma=0.01$  to 100 %) at fixed frequency (1.0 Hz) of ISF<sub>SE</sub>-stabilized emulsion gels at different oil volume fractions ( $\phi$ ) with a fixed ISF concentration of 1.0 wt%.

**Fig. S1**

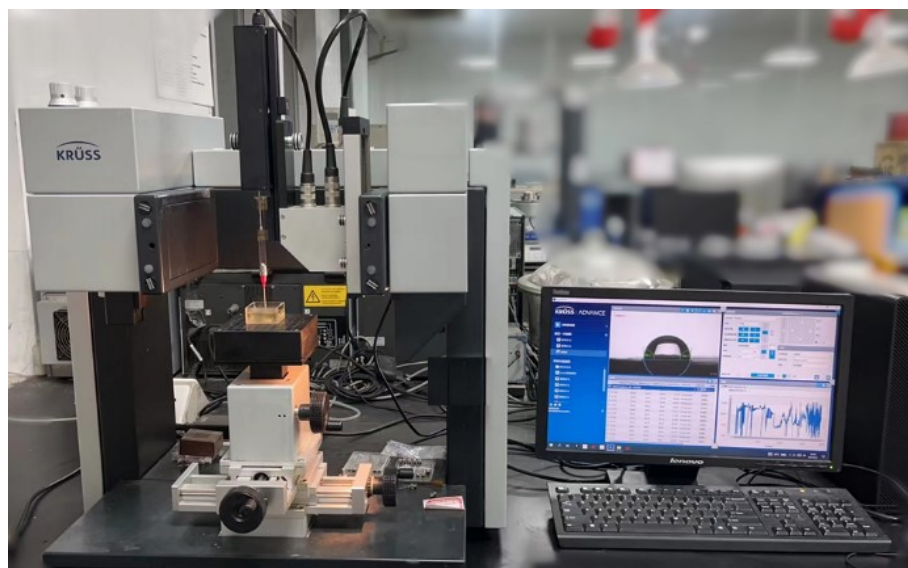

**Fig. S2**

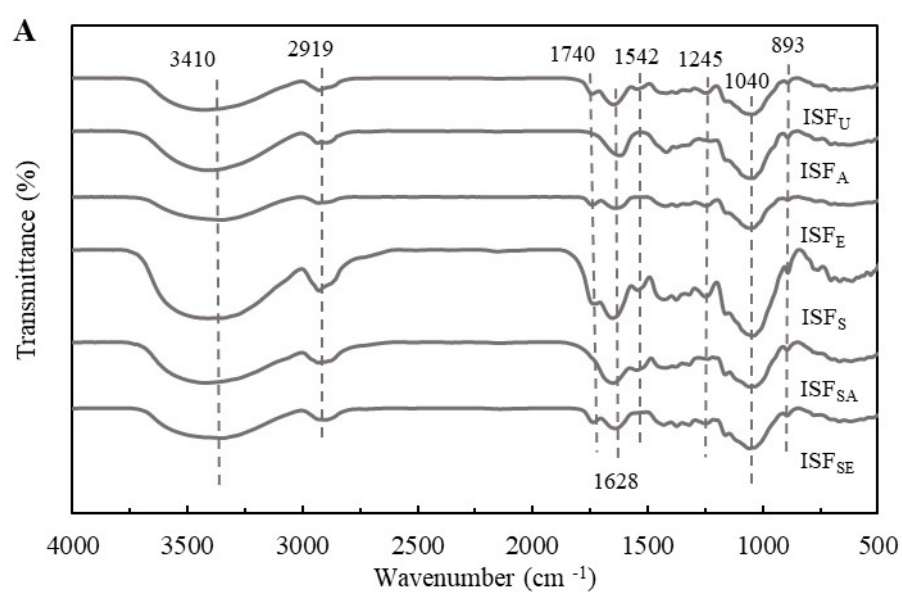

**B**

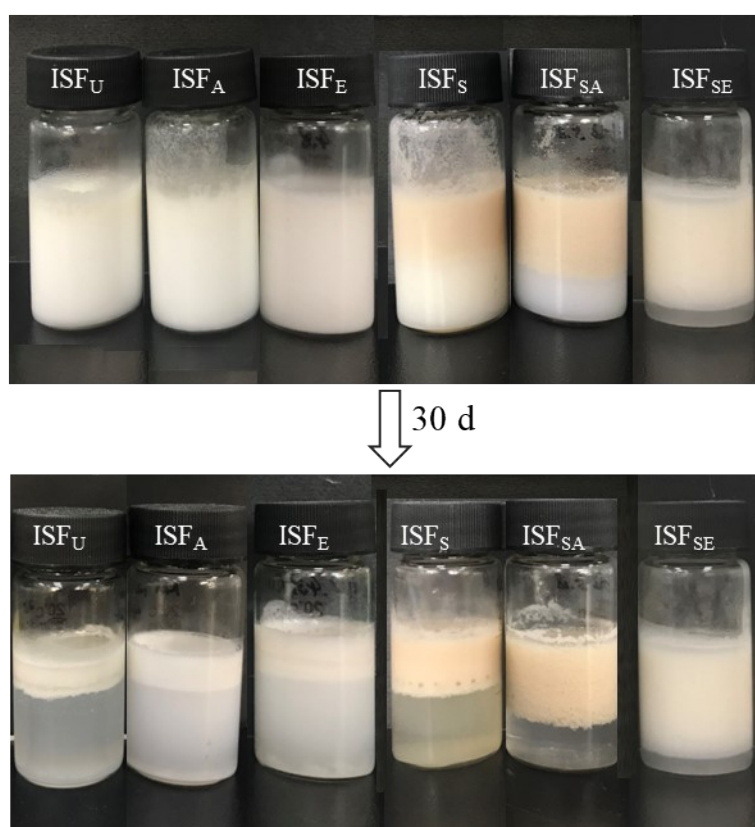

**Fig. S3**

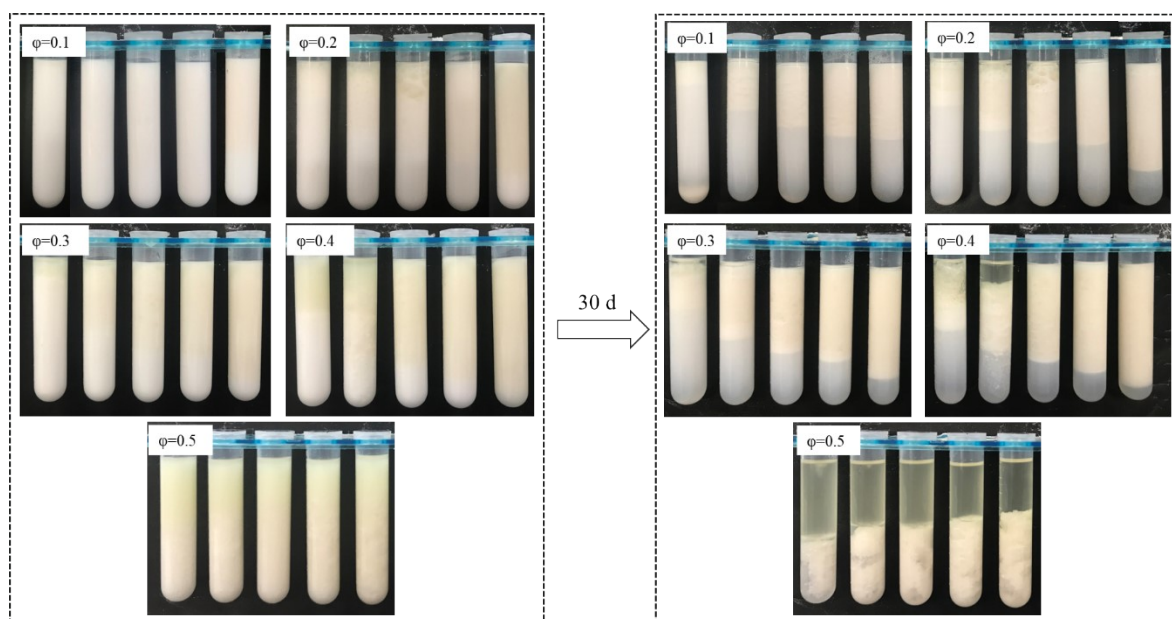

**Fig. S4**

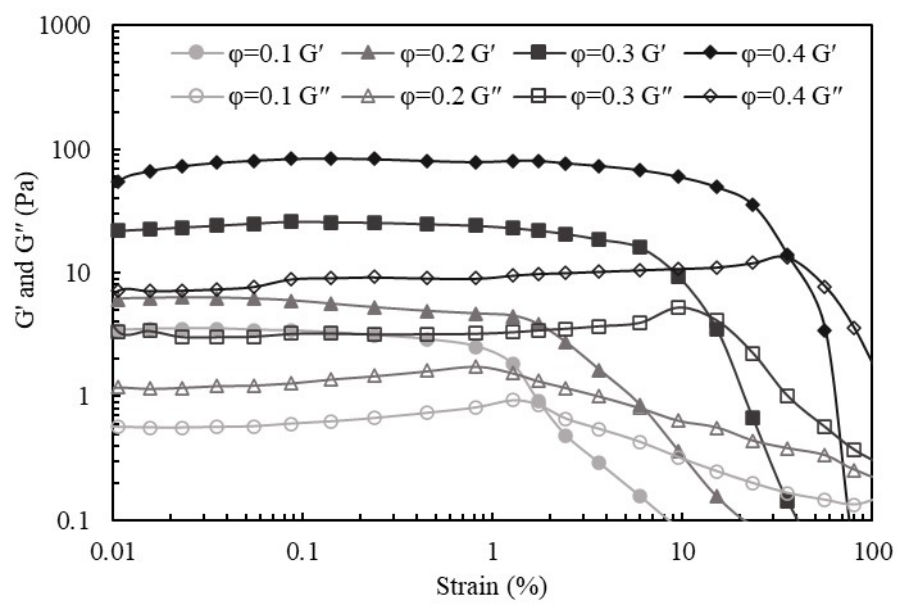

Supplement: d3sm00189j1.pdf [file d3sm00189j1.pdf]
